# Supplementary material
Source: publisher figshare collection journal article supplement (https://acs.figshare.com/ndownloader/files/3874879)
Supplement: Supplementary file 1 [file 3874879]

Supporting Information for

**Correlation of Mesh-Size of Metal–Carboxylate Layer with Degree of Interpenetration in Pillared-Layer Frameworks**

Cheng-Hua Lee,<sup>†,‡</sup> Jing-Yun Wu,<sup>\*,§</sup> Gene-Hsiang Lee,<sup>¶</sup> Shie-Ming Peng,<sup>¶</sup> Jyh-Chiang Jiang,<sup>#</sup> and Kuang-Lieh Lu<sup>\*,†</sup>

<sup>†</sup>Institute of Chemistry, Academia Sinica, Taipei 115, Taiwan. Fax: +886-2-27831237; E-mail: kllu@gate.sinica.edu.tw

<sup>‡</sup>Graduate Institute of Applied Science and Technology, National Taiwan University of Science and Technology, Taipei 106, Taiwan

<sup>§</sup>Department of Applied Chemistry, National Chi Nan University, Nantou 545, Taiwan. E-mail: jyunwu@ncnu.edu.tw

<sup>¶</sup>Department of Chemistry, National Taiwan University, Taipei 107, Taiwan

<sup>#</sup>Department of Chemical Engineering, National Taiwan University of Science and Technology, Taipei 106, Taiwan

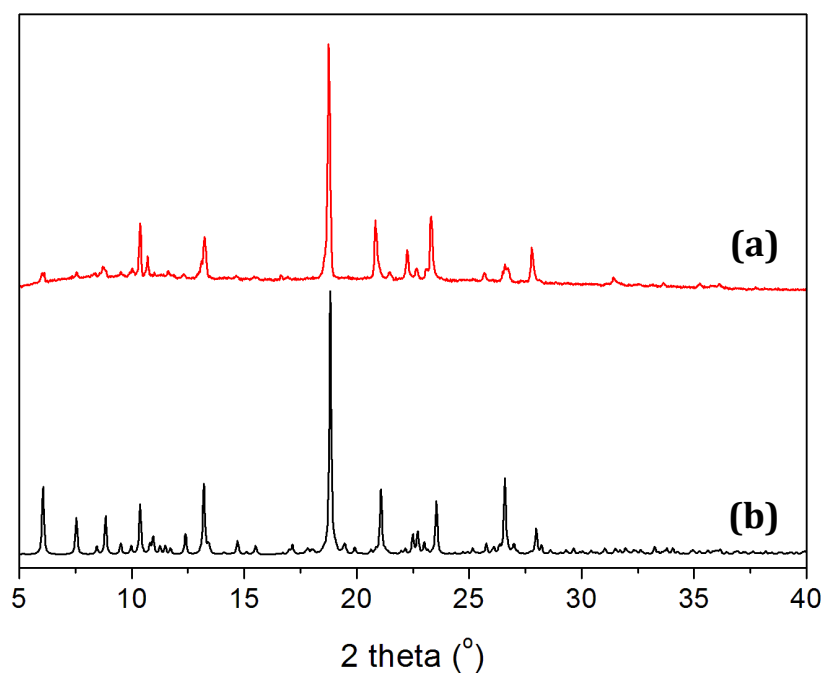

**Figure S1.** Powder X-Ray diffraction (PXRD) patterns of **1**: (a) a freshly grounded sample at room temperature; (b) simulated from the single-crystal data.

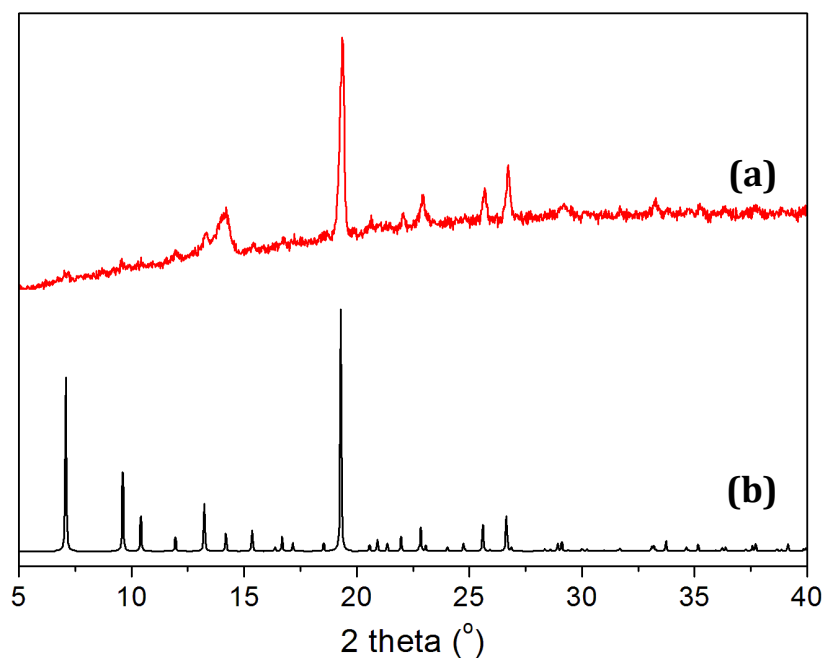

**Figure S2.** Powder X-ray diffraction (PXRD) patterns of **2**: (a) a freshly grounded sample at room temperature; (b) simulated from the single-crystal data. For **2**, it was a challenge to obtain a well-resolved PXRD pattern that is well-matched with the simulated PXRD patterns since the lattice solvent molecules might have escaped the crystal lattice on loading the sample for PXRD measurement.

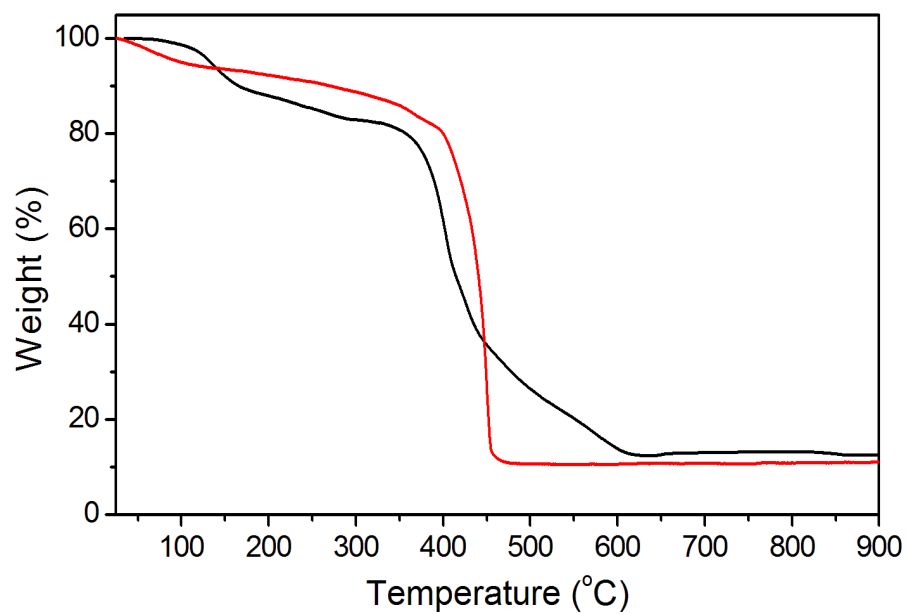

**Figure S3.** Thermogravimetric (TG) curves of compounds **1** (black line) and **2** (red line).

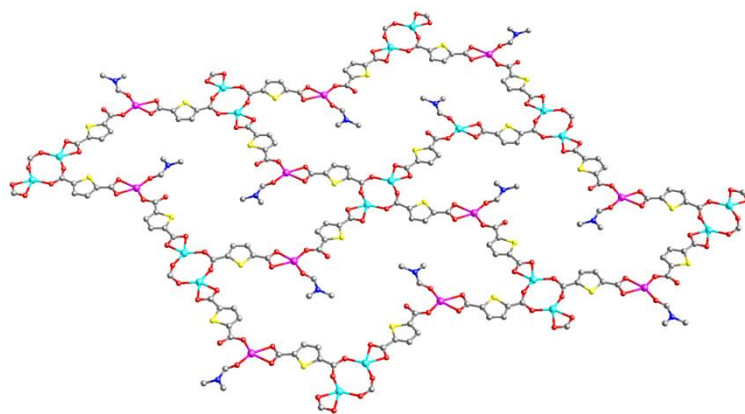

**Figure S4.** View of the 2D Co-thdc layer showing a rhomboid grid of 4<sup>4</sup>-**sql** topology in **1**.

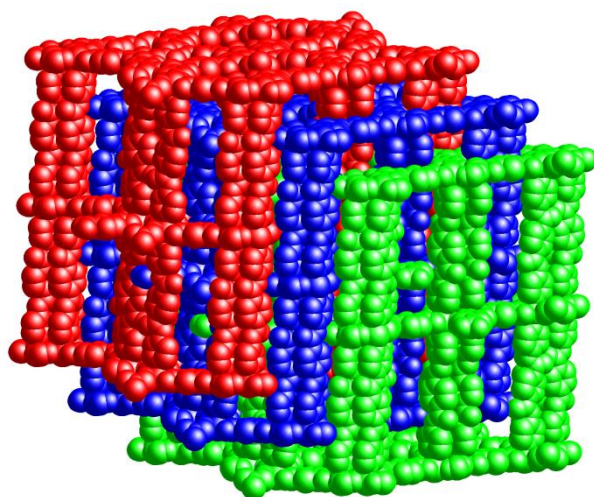

**Figure S5.** Space-filling representation of the 3-fold interpenetration of **pcu** net.

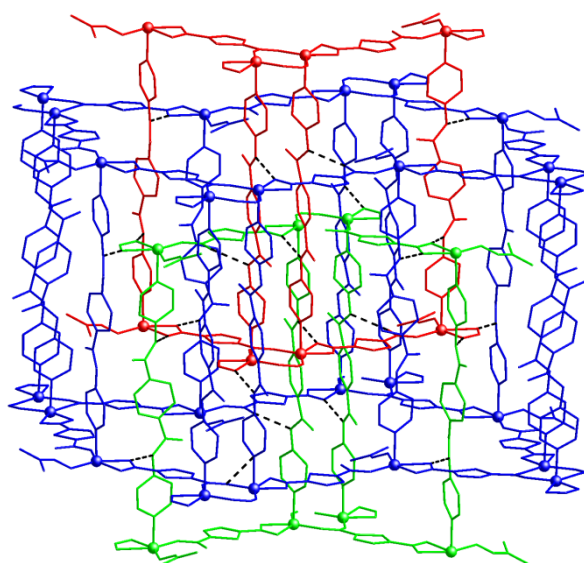

**Figure S6.** Side-view of the net-to-net N-H...O hydrogen-bonding interactions in **1**.

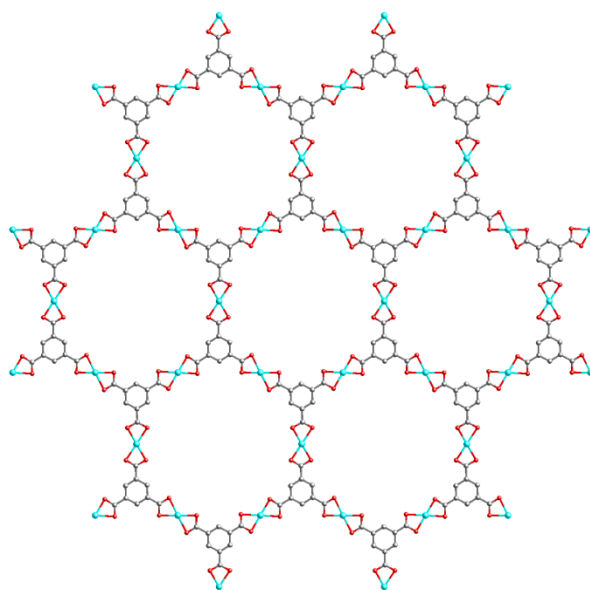

**Figure S7.** View of the 2D Co–btc layer showing a honeycomb-like 6<sup>3</sup>-topology in **2**.

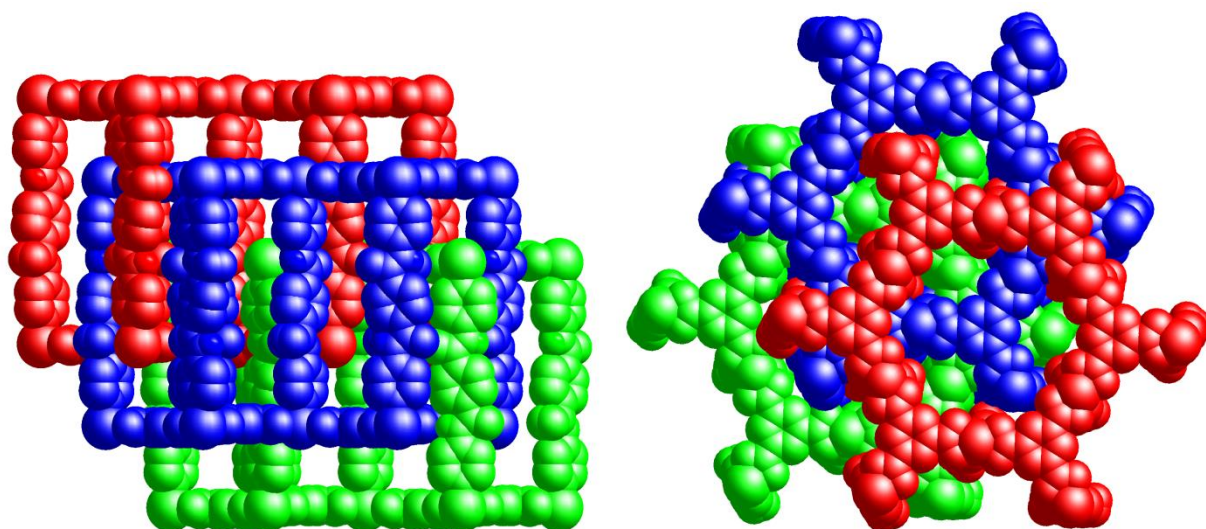

**Figure S8.** Space-filling representation of the 3-fold interpenetration of net in **2**, viewed along the crystallographic *b* (left) and *c* (right) axes.

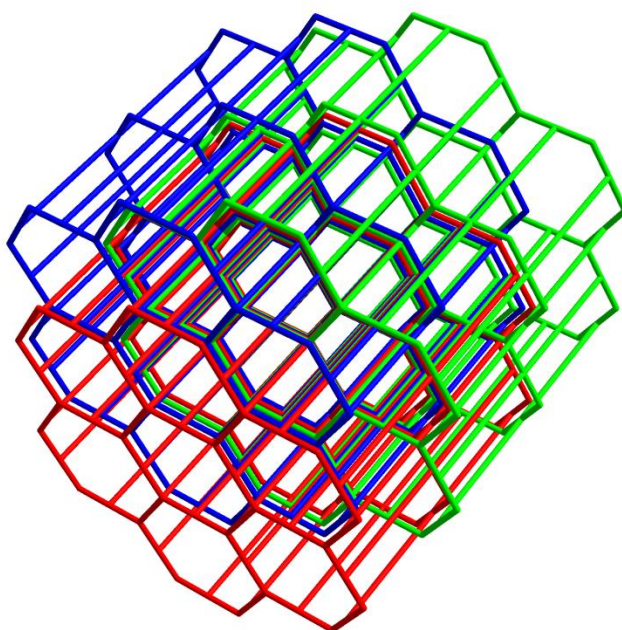

**Figure S9.** View of the 3-fold interpenetration of net in **2** along the crystallographic  $[2,1,1]$  direction, showing that they are related by a single translation vector.

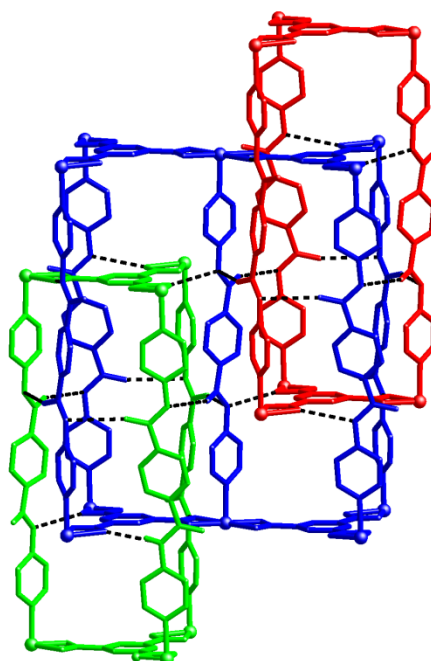

**Figure S10.** Side-view of the net-to-net N-H...O hydrogen-bonding interactions in **2**.
